# Supplementary material for: A preliminary study on the application of PspA as a carrier for group A meningococcal polysaccharide
Source: PLoS One. 2019 Jul 10;14(7):e0218427. doi: 10.1371/journal.pone.0218427 (PMC6619668; doi:10.1371/journal.pone.0218427)
Supplement: S1 Table — (XLSX) [file pone.0218427.s001.xlsx]

## Sheet: Sheet1
IgG	DB-1	DB1	DB2	DB3	DB4	DB5	DB6	D-A1	D-A2	D-A3	D-A4	D-A5	12
	29	2.5924	2.0457	2.6482	3.0526	1.5794	3.0299	2.7547	1.9504	0.3644	3.2778	2.9687	0.0963	0.20223
		1.0744	0.8135	1.0924	1.6929	0.5297	1.5178	1.0093	0.6292	0.1573	1.7043	1.3563	0.0602	0.12642
		0.6664	0.497	0.6637	1.0863	0.3216	0.9542	0.6068	0.4036	0.12	1.0569	0.8524	0.0702	0.14742
		0.392	0.3005	0.3855	0.677	0.199	0.6095	0.3481	0.2574	0.0888	0.6021	0.519	0.047	0.0987
		0.2271	0.183	0.2233	0.4	0.1253	0.3415	0.2248	0.1807	0.0666	0.3587	0.3622	0.0486	0.10206
		0.1507	0.1306	0.1384	0.2445	0.0885	0.2113	0.1432	0.1391	0.0603	0.2349	0.2403	0.0502	0.10542
		0.0996	0.088	0.0927	0.1555	0.0683	0.1409	0.1023	0.1126	0.0591	0.1559	0.1558	0.0514	0.10794
		0.0821	0.0802	0.0744	0.1099	0.066	0.0986	0.1002	0.1059	0.0518	0.1167	0.1116	0.0497	0.10437
	DB-2	D-A6											12	25.2
	29	3.4028											0.1152	0.24192
		2.7379											0.072	0.1512
		1.9532											0.078	0.1638
		1.2566											0.0716	0.15036
		0.7546											0.0722	0.15162
		0.4636											0.0706	0.14826
		0.2771											0.0753	0.15813
		0.1924											0.0753	0.15813
	EF-1	EF1	EF2	EF3	EF4	EF5	EF6	E-A1	E-A2	E-A3	E-A4	E-A5	12	25.2
	29	3.3272	3.3464	3.1599	3.3364	3.24	3.3632	3.1401	2.1425	1.9733	2.9393	2.0014	0.0809	0.16989
		3.0656	3.1001	2.1619	3.2923	2.2863	3.2115	1.7061	0.6837	0.7498	1.3896	0.6821	0.0548	0.11508
		2.7188	2.7238	1.5354	3.1698	1.5816	2.9117	1.0902	0.3893	0.4479	0.7897	0.395	0.0585	0.12285
		2.1738	2.1694	1.0152	3.0362	1.0042	2.4609	0.6404	0.2315	0.2748	0.462	0.213	0.0493	0.10353
		1.5978	1.6355	0.6412	2.6095	0.625	1.8367	0.376	0.1424	0.1736	0.2707	0.1425	0.0509	0.10689
		1.0742	1.1075	0.4078	2.0951	0.3526	1.323	0.2243	0.0985	0.1162	0.1701	0.0946	0.0538	0.11298
		0.7058	0.7327	0.2452	1.5788	0.2215	0.8785	0.1394	0.0748	0.086	0.111	0.0728	0.0551	0.11571
		0.4551	0.4749	0.1714	1.1628	0.1539	0.6106	0.1076	0.0709	0.0914	0.0901	0.0749	0.0551	0.11571
	EF-2	E-A6											12	25.2
	29	2.0734											0.0755	0.15855
		0.8325											0.0517	0.10857
		0.5139											0.051	0.1071
		0.3036											0.0542	0.11382
		0.1873											0.0536	0.11256
		0.1235											0.0545	0.11445
		0.0874											0.0511	0.10731
		0.0747											0.0594	0.12474
	RX-1	RX1	RX2	RX3	RX4	RX5	RX6	R-A1	R-A2	R-A3	R-A4	R-A5	12	25.2
	29	3.0731	1.7249	2.3772	1.2206	0.8504	0.1584	0.8341	3.0499	3.0739	3.0202	3.0094	0.0849	0.17829
		2.7368	0.5985	1.0905	0.3786	0.1977	0.0685	0.2521	2.2079	2.2578	2.4702	2.1612	0.0581	0.12201
		2.3377	0.358	0.6396	0.2206	0.1149	0.0541	0.2001	1.6258	1.8141	1.874	1.6156	0.0542	0.11382
		1.9452	0.2179	0.3804	0.1333	0.0847	0.0518	0.1023	1.0243	1.2081	1.3333	1.011	0.0497	0.10437
		1.4496	0.1434	0.241	0.0897	0.0627	0.0463	0.0766	0.6557	0.7741	0.8832	0.596	0.0532	0.11172
		0.9907	0.0965	0.1432	0.0657	0.0507	0.045	0.0592	0.4237	0.4743	0.5343	0.3579	0.0537	0.11277
		0.6158	0.0724	0.0962	0.0563	0.035	0.0432	0.0553	0.2634	0.3235	0.356	0.2246	0.0555	0.11655
		0.3919	0.0597	0.0707	0.0566	0.0442	0.0464	0.0468	0.1726	0.2077	0.2188	0.1461	0.0567	0.11907
	RX-2	R-A5											12	25.2
	28.9	3.1806											0.0794	0.16674
		2.7724											0.0558	0.11718
		2.3226											0.0617	0.12957
		1.8153											0.0561	0.11781
		1.2802											0.0574	0.12054
		0.8417											0.0465	0.09765
		0.5454											0.049	0.1029
		0.3544											0.0503	0.10563
	TT-1	TT1	TT2	TT3	TT4	TT5	TT6	T-A1	T-A2	T-A3	T-A4	T-A5	12	25.2
	29	2.8865	3.0522	2.7811	3.0531	2.9466	2.8255	0.3453	0.3223	0.5225	0.1087	0.0775	0.0682	0.14322
		2.1526	2.3348	1.9586	2.4287	2.2102	1.8121	0.1078	0.1069	0.1528	0.0581	0.0554	0.055	0.1155
		1.6577	1.7701	1.4123	1.8821	1.7607	1.322	0.0759	0.0749	0.0929	0.0498	0.0567	0.0547	0.11487
		1.1795	1.2385	0.9723	1.3873	1.2754	0.8823	0.0574	0.0614	0.0681	0.048	0.0472	0.0541	0.11361
		0.8006	0.8211	0.6336	0.9349	0.8699	0.5369	0.0523	0.0518	0.0598	0.0459	0.0491	0.0512	0.10752
		0.4975	0.5039	0.3814	0.5835	0.5569	0.3334	0.0496	0.0469	0.0506	0.0492	0.0483	0.0526	0.11046
		0.3021	0.3265	0.2504	0.3827	0.3738	0.2208	0.0474	0.0466	0.0531	0.0472	0.049	0.0531	0.11151
		0.2003	0.2069	0.1738	0.2607	0.2568	0.1483	0.0551	0.0576	0.0507	0.0511	0.0524	0.0555	0.11655
	TT-2	T-A6											12	25.2
	29	0.648											0.0781	0.16401
		0.2025											0.053	0.1113
		0.1268											0.0513	0.10773
		0.0897											0.05	0.105
		0.0677											0.0495	0.10395
		0.0593											0.0487	0.10227
		0.0566											0.052	0.1092
		0.052											0.0517	0.10857

## Sheet: Sheet2
IgG1
IgG1-4				db-a
0.167	0.129	0.335	2.832	2.454	1.721	2.756					0.081
0.096	0.077	0.11	1.099	1.023	0.387	1.096					0.08
0.082	0.069	0.076	0.602	0.582	0.227	0.679					0.067
0.072	0.065	0.067	0.325	0.364	0.135	0.311					0.063
0.069	0.063	0.06	0.207	0.217	0.09	0.193					0.063
0.065	0.068	0.059	0.131	0.142	0.071	0.121					0.06
0.066	0.061	0.057	0.09	0.098	0.061	0.08					0.065
0.066	0.053	0.059	0.077	0.079	0.057	0.075					0.064
IgG1-5				E-A
0.284			0.228	1.885	1.484	1.956	2.478	1.975			0.081
0.123			0.103	0.687	0.356	0.563	1.006	0.508			0.05
0.089			0.084	0.389	0.187	0.316	0.547	0.275			0.06
0.075			0.074	0.209	0.114	0.178	0.325	0.17			0.06
0.067			0.065	0.128	0.081	0.112	0.184	0.106			0.059
0.067			0.061	0.097	0.068	0.086	0.124	0.08			0.06
0.066			0.069	0.07	0.06	0.067	0.098	0.073			0.062
0.062			0.063	0.064	0.057	0.061	0.071	0.061			0.063
IgG1-6	E+A				R-A
0.138					1.117	2.324	2.457	2.584	2.104	2.386	0.081
0.084					0.308	0.865	1.17	1.286	0.655	1.055	0.069
0.07					0.164	0.45	0.634	0.653	0.355	0.535	0.065
0.066					0.098	0.23	0.341	0.358	0.164	0.263	0.061
0.064					0.072	0.135	0.191	0.18	0.107	0.159	0.058
0.063					0.055	0.095	0.121	0.122	0.081	0.112	0.06
0.063					0.057	0.075	0.093	0.092	0.07	0.078	0.06
0.065					0.057	0.06	0.075	0.069	0.063	0.07	0.064
					1600	3200	6400	6400	3200	6400
IgG1-7						A
						0.146	0.179	0.132	0.148	0.186	0.077
						0.085	0.085	0.076	0.069	0.075	0.064
						0.069	0.074	0.064	0.055	0.059	0.053
						0.058	0.063	0.053	0.057	0.062	0.062
						0.051	0.058	0.054	0.055	0.047	0.048
						0.058	0.054	0.055	0.047	0.046	0.054
						0.062	0.047	0.051	0.048	0.058	0.055
						0.053	0.058	0.064	0.05	0.059	0.062
IgG1-8	TT-A
0.161	2.426	2.36	2.358	1.426	2.345	2.582					0.068
0.083	1.001	0.711	1.077	0.503	0.714	1.037					0.066
0.07	0.584	0.391	0.551	0.275	0.355	0.594					0.061
0.066	0.3	0.192	0.27	0.173	0.191	0.315					0.065
0.068	0.174	0.117	0.179	0.118	0.121	0.194					0.062
0.061	0.128	0.092	0.114	0.083	0.091	0.13					0.061
0.064	0.094	0.075	0.085	0.072	0.075	0.092					0.074
0.063	0.078	0.067	0.07	0.063	0.06	0.068					0.069
	6400	3200	6400	3200	3200	6400

## Sheet: Sheet3
IgG2a-4			db-a
0.082	0.072	0.33	0.395	0.36	0.16	0.73					0.058
0.074	0.067	0.095	0.103	0.109	0.079	0.121					0.06
0.072	0.068	0.076	0.082	0.083	0.064	0.091					0.059
0.069	0.068	0.075	0.073	0.074	0.07	0.077					0.06
0.07	0.063	0.065	0.069	0.066	0.062	0.068					0.061
0.068	0.067	0.067	0.062	0.061	0.067	0.067					0.059
0.065	0.063	0.061	0.061	0.062	0.061	0.063					0.061
0.069	0.06	0.062	0.059	0.058	0.058	0.063					0.059
IgG2a-5				E-A
0.081			0.068	0.149	0.269	0.187	0.238	0.175			0.062
0.072			0.067	0.073	0.069	0.08	0.083	0.067			0.066
0.067			0.06	0.061	0.084	0.064	0.07	0.062			0.069
0.065			0.058	0.07	0.061	0.063	0.062	0.064			0.066
0.064			0.058	0.057	0.057	0.057	0.057	0.058			0.062
0.062			0.057	0.056	0.06	0.058	0.056	0.06			0.064
0.068			0.057	0.052	0.059	0.057	0.065	0.057			0.065
0.065			0.09	0.057	0.058	0.063	0.068	0.059			0.074
IgG2a-6					R-A
0.06					0.066	0.141	0.126	0.17	0.107	0.135	0.059
0.058					0.053	0.065	0.068	0.064	0.062	0.069	0.057
0.057					0.051	0.055	0.059	0.06	0.059	0.07	0.059
0.057					0.055	0.055	0.053	0.055	0.054	0.057	0.058
0.055					0.054	0.049	0.053	0.059	0.055	0.058	0.059
0.056					0.056	0.054	0.052	0.053	0.054	0.057	0.06
0.056					0.055	0.05	0.056	0.055	0.056	0.056	0.059
0.061					0.057	0.056	0.058	0.057	0.058	0.059	0.063
IgG2a-7	R+A					A
0.063						0.073	0.06	0.056	0.058	0.057	0.057
0.064						0.055	0.054	0.053	0.055	0.055	0.057
0.058						0.054	0.054	0.059	0.057	0.056	0.057
0.057						0.054	0.056	0.057	0.057	0.055	0.058
0.057						0.056	0.054	0.057	0.055	0.055	0.057
0.057						0.055	0.056	0.057	0.058	0.057	0.057
0.059						0.057	0.057	0.056	0.059	0.056	0.057
0.06						0.062	0.06	0.059	0.061	0.058	0.059
IgG2a-8	TT-A
0.059	0.13	0.319	0.098	0.085	0.114	0.294					0.049
0.056	0.07	0.093	0.069	0.06	0.063	0.091					0.06
0.058	0.065	0.072	0.06	0.059	0.059	0.07					0.086
0.058	0.06	0.061	0.056	0.056	0.056	0.06					0.06
0.059	0.057	0.058	0.059	0.064	0.057	0.06					0.061
0.061	0.059	0.06	0.071	0.057	0.057	0.056					0.057
0.058	0.058	0.057	0.058	0.057	0.058	0.077					0.059
0.057	0.056	0.06	0.062	0.061	0.058	0.06					0.062
