# Supplementary material for: A preliminary study on the application of PspA as a carrier for group A meningococcal polysaccharide
Source: PLoS One. 2019 Jul 10;14(7):e0218427. doi: 10.1371/journal.pone.0218427 (PMC6619668; doi:10.1371/journal.pone.0218427)
Supplement: S4 Table — (XLSX) [file pone.0218427.s004.xlsx]

## Sheet: Sheet1
IgG1	DB-1	DB1	DB2	DB3	DB4	DB5	DB6	D-A1	D-A2	D-A3	D-A4	D-A5	12
	28.8	0.8719	0.6593	0.9154	1.126	0.5474	1.1737	1.0784	0.7655	0.1398	0.973	1.3134	0.043	0.0903	200
		0.3544	0.3243	0.3762	0.6064	0.2164	0.591	0.3609	0.2669	0.0568	0.3408	0.528	0.0385	0.08085	400
		0.2409	0.1832	0.2635	0.4133	0.1403	0.3856	0.2263	0.1719	0.0499	0.2139	0.3337	0.0398	0.08358	800
		0.1507	0.1255	0.1496	0.2625	0.0856	0.237	0.1396	0.12	0.0457	0.1371	0.1969	0.0403	0.08463	1600
		0.0948	0.0862	0.095	0.1559	0.0666	0.1418	0.0972	0.0889	0.0426	0.0985	0.1365	0.0404	0.08484	3200
		0.0632	0.0608	0.0635	0.0958	0.0573	0.0909	0.069	0.0705	0.0409	0.0788	0.0888	0.0403	0.08463	6400
		0.0494	0.0448	0.0506	0.068	0.0463	0.0649	0.0531	0.0642	0.0408	0.0661	0.0596	0.0395	0.08295	12800
		0.044	0.043	0.0454	0.0549	0.0428	0.0531	0.0467	0.0522	0.0411	0.0535	0.0481	0.0395	0.08295	25600
	DB-2	D-A6											12	25.2
	28.8	2.6647											0.0564	0.11844	200
		1.5988											0.0467	0.09807	400
		1.1136											0.0451	0.09471	800
		0.7235											0.0449	0.09429	1600
		0.4489											0.0448	0.09408	3200
		0.2876											0.0444	0.09324	6400
		0.1748											0.0442	0.09282	12800
		0.1114											0.0471	0.09891	25600
	EF-1	EF1	EF2	EF3	EF4	EF5	EF6	E-A1	E-A2	E-A3	E-A4	E-A5	12	25.2
	28.8	2.8809	2.7781	2.6806	2.8002	2.6412	2.834	2.2039	1.7669	1.8722	1.9844	1.3725	0.0576	0.12096	200
		2.562	2.4834	1.9616	2.8072	1.6424	2.5747	0.9863	0.6352	0.763	0.7537	0.4198	0.0329	0.06909	400
		2.3635	2.2408	1.5432	2.7058	1.1807	2.3329	0.5885	0.3745	0.469	0.4313	0.2279	0.0332	0.06972	800
		1.9652	1.8659	1.1181	2.5434	0.7771	2.0437	0.3421	0.2218	0.2726	0.2542	0.1434	0.0366	0.07686	1600
		1.5362	1.4447	0.708	2.2472	0.4801	1.5796	0.2172	0.138	0.1663	0.1537	0.0847	0.038	0.0798	3200
		1.0724	1.0296	0.4433	1.8384	0.2874	1.1899	0.1295	0.0909	0.1098	0.102	0.0666	0.0419	0.08799	6400
		0.6979	0.6914	0.2719	1.4307	0.1812	0.8138	0.088	0.0799	0.075	0.0742	0.053	0.0446	0.09366	12800
		0.4447	0.4276	0.174	1.0895	0.1196	0.5446	0.069	0.0574	0.062	0.0586	0.0488	0.0434	0.09114	25600
	EF0-2	E-A6											12	25.2
	28.8	1.8611											0.0554	0.11634	200
		0.7991											0.0446	0.09366	400
		0.4894											0.0436	0.09156	800
		0.2953											0.0433	0.09093	1600
		0.1758											0.0431	0.09051	3200
		0.1128											0.0426	0.08946	6400
		0.0774											0.0437	0.09177	12800
		0.061											0.0445	0.09345	25600
	RX-1	RX1	RX2	RX3	RX4	RX5	RX6	R-A1	R-A2	R-A3	R-A4	R-A5	12	25.2
	28.8	2.5696	1.2934	1.7223	1.0518	0.6323	0.0881	0.7417	2.3644	2.3691	2.4366	2.3292	0.0554	0.11634	200
		2.2634	0.4621	0.7882	0.346	0.1654	0.0507	0.1931	1.6662	1.694	1.9468	1.5517	0.0426	0.08946	400
		1.9714	0.2715	0.4681	0.2007	0.0994	0.0425	0.119	1.2516	1.3564	1.5148	1.1091	0.0424	0.08904	800
		1.6239	0.1659	0.2633	0.1206	0.0696	0.0442	0.0838	0.8958	0.9336	1.117	0.6767	0.045	0.0945	1600
		1.256	0.1118	0.1706	0.083	0.0561	0.043	0.0612	0.5582	0.6002	0.7531	0.414	0.0437	0.09177	3200
		0.8842	0.0793	0.1056	0.0627	0.0468	0.0481	0.0508	0.317	0.3547	0.4942	0.251	0.0409	0.08589	6400
		0.5645	0.0583	0.0745	0.0478	0.0484	0.0417	0.0452	0.2002	0.2161	0.2863	0.1456	0.0489	0.10269	12800
		0.3556	0.0507	0.0616	0.0473	0.0441	0.0443	0.0451	0.1357	0.1448	0.1772	0.0985	0.0448	0.09408	25600
	RX-2	R-A5											12	25.2
	28.8	2.6905											0.0524	0.11004	200
		2.276											0.0493	0.10353	400
		1.954											0.0447	0.09387	800
		1.5737											0.0448	0.09408	1600
		1.1532											0.0459	0.09639	3200
		0.7448											0.045	0.0945	6400
		0.4672											0.0502	0.10542	12800
		0.2802											0.0441	0.09261	25600
	TT-1	TT1	TT2	TT3	TT4	TT5	TT6	T-A1	T-A2	T-A3	T-A4	T-A5	12	25.2
	28.8	2.8748	2.9428	2.9087	2.9386	3.0367	2.9648	0.4404	0.4019	0.3842	0.1219	0.0645	0.053	0.1113	200
		2.3932	2.4976	2.2823	2.5314	2.5798	2.1805	0.1322	0.132	0.1352	0.0579	0.0467	0.0442	0.09282	400
		1.9951	1.9994	1.7462	2.0923	2.1036	1.6675	0.0863	0.0855	0.0789	0.0548	0.0429	0.0466	0.09786	800
		1.5055	1.429	1.2054	1.5871	1.6322	1.205	0.0626	0.0641	0.0627	0.0417	0.0432	0.0433	0.09093	1600
		1.0338	0.9645	0.7927	1.0142	1.1111	0.7015	0.054	0.0524	0.0521	0.0444	0.0463	0.0456	0.09576	3200
		0.6257	0.623	0.4725	0.6477	0.7537	0.4191	0.0475	0.0478	0.0469	0.043	0.043	0.0442	0.09282	6400
		0.376	0.3625	0.2827	0.3897	0.4782	0.2575	0.0467	0.0452	0.0441	0.0578	0.042	0.0453	0.09513	12800
		0.2348	0.2048	0.1746	0.2369	0.3132	0.1647	0.0501	0.0464	0.0452	0.0445	0.0446	0.0467	0.09807	25600
	TT-2												12	25.2
	28.8	0.6494											0.0539	0.11319	200
		0.2047											0.0438	0.09198	400
		0.1234											0.0437	0.09177	800
		0.0845											0.0585	0.12285	1600
		0.0638											0.0474	0.09954	3200
		0.0543											0.0455	0.09555	6400
		0.0473											0.0442	0.09282	12800
		0.0477											0.0462	0.09702	25600

## Sheet: Sheet2
IgG2a	DB-1	DB1	DB2	DB3	DB4	DB5	DB6	D-A1	D-A2	D-A3	D-A4	D-A5	12
	28.8	0.255	0.1917	0.2318	0.3391	0.172	0.3098	0.3465	0.2167	0.0995	2.2715	0.471	0.0506	0.10626	50
		0.1598	0.1347	0.1507	0.2397	0.1045	0.2095	0.1854	0.1282	0.073	1.1526	0.2836	0.0452	0.09492	100
		0.114	0.0966	0.1094	0.171	0.0763	0.1543	0.1298	0.0956	0.0606	0.6693	0.1988	0.0451	0.09471	200
		0.088	0.0742	0.0856	0.1311	0.0607	0.1194	0.0921	0.0694	0.0545	0.3645	0.1372	0.0445	0.09345	400
		0.0676	0.0637	0.0647	0.0937	0.0497	0.084	0.0709	0.0553	0.0568	0.2022	0.1084	0.0455	0.09555	800
		0.0549	0.0538	0.0522	0.0675	0.0519	0.0633	0.0538	0.0433	0.0479	0.1223	0.0832	0.0442	0.09282	1600
		0.0488	0.0492	0.0477	0.0564	0.0438	0.0525	0.0444	0.0449	0.0448	0.0834	0.0711	0.0437	0.09177	3200
		0.0491	0.046	0.054	0.0498	0.0445	0.0465	0.0447	0.0474	0.0488	0.0639	0.0607	0.0473	0.09933	6400
	DB-2	D-A6											12	25.2
	28.8	2.9227											0.0516	0.10836	50
		2.2445											0.0434	0.09114	100
		1.5438											0.0437	0.09177	200
		0.9273											0.0474	0.09954	400
		0.5416											0.049	0.1029	800
		0.3005											0.0445	0.09345	1600
		0.1785											0.0438	0.09198	3200
		0.1164											0.0504	0.10584	6400
	EF-1	EF1	EF2	EF3	EF4	EF5	EF6	E-A1	E-A2	E-A3	E-A4	E-A5	12	25.2
	28.7	1.6173	2.3667	0.9209	3.0194	2.4847	3.3096	2.5429	0.3882	0.3581	2.271	1.1905	0.0579	0.12159	50
		0.8948	1.3403	0.4238	2.3992	1.1086	2.7612	0.9795	0.159	0.1701	0.9153	0.4441	0.05	0.105	100
		0.5387	0.8334	0.2769	1.912	0.6434	1.9761	0.563	0.1041	0.1171	0.5047	0.2508	0.0493	0.10353	200
		0.3432	0.4874	0.1919	1.4292	0.3595	1.1585	0.3202	0.0746	0.0855	0.2916	0.1467	0.0477	0.10017	400
		0.2267	0.3075	0.1294	0.9334	0.2045	0.6435	0.1787	0.059	0.0645	0.1732	0.097	0.0482	0.10122	800
		0.1585	0.2017	0.09	0.5639	0.127	0.3875	0.1136	0.052	0.0536	0.1088	0.0701	0.0474	0.09954	1600
		0.1123	0.1335	0.0687	0.3544	0.0871	0.2335	0.077	0.0478	0.0494	0.0822	0.0572	0.0475	0.09975	3200
		0.0774	0.0891	0.0574	0.2214	0.0641	0.1443	0.0609	0.0483	0.0478	0.0644	0.0527	0.0502	0.10542	6400
	EF-2	E-A6											12	25.2
	28.7	0.6589											0.0543	0.11403	50
		0.2523											0.0502	0.10542	100
		0.1576											0.0471	0.09891	200
		0.1021											0.0492	0.10332	400
		0.0752											0.0483	0.10143	800
		0.0602											0.0479	0.10059	1600
		0.0574											0.0483	0.10143	3200
		0.052											0.0509	0.10689	6400
	RX-1	RX1	RX2	RX3	RX4	RX5	RX6	R-A1	R-A2	R-A3	R-A4	R-A5	12	25.2
	28.8	1.2301	0.4751	0.9234	0.3153	0.1859	0.0979	0.1611	2.3435	2.7775	1.6699	2.3767	0.0556	0.11676	50
		0.6972	0.2053	0.3704	0.147	0.089	0.0696	0.085	1.0936	1.4164	0.9103	1.1827	0.0471	0.09891	100
		0.4868	0.1291	0.2183	0.1002	0.0647	0.0544	0.0622	0.6167	0.9087	0.5963	0.7053	0.0473	0.09933	200
		0.3482	0.0901	0.1337	0.0703	0.0529	0.049	0.0523	0.3519	0.5427	0.3799	0.409	0.0506	0.10626	400
		0.2469	0.0712	0.1017	0.0571	0.0482	0.0453	0.0493	0.2138	0.3254	0.2458	0.2333	0.0515	0.10815	800
		0.1743	0.0589	0.0705	0.1158	0.0455	0.0432	0.0448	0.1332	0.1985	0.157	0.1411	0.0465	0.09765	1600
		0.1168	0.0535	0.0554	0.0692	0.0463	0.0412	0.044	0.0908	0.1279	0.1093	0.0935	0.047	0.0987	3200
		0.0867	0.0485	0.0503	0.0532	0.0437	0.0437	0.0446	0.0678	0.0891	0.078	0.0715	0.0502	0.10542	6400
	RX-2												12	25.2
	28.8	2.0876											0.0542	0.11382	50
		1.053											0.0503	0.10563	100
		0.6762											0.0483	0.10143	200
		0.4304											0.0496	0.10416	400
		0.2839											0.0462	0.09702	800
		0.1835											0.0479	0.10059	1600
		0.119											0.0475	0.09975	3200
		0.0875											0.0506	0.10626	6400
	TT-1	TT1	TT2	TT3	TT4	TT5	TT6	T-A1	T-A2	T-A3	T-A4	T-A5	12	25.2
	28.7	0.6384	1.4804	0.6312	1.1891	0.5345	0.7134	0.1575	0.1512	0.4708	0.07	0.0581	0.0458	0.09618	50
		0.3887	1.123	0.4242	0.9797	0.3246	0.3821	0.0771	0.0706	0.1703	0.0492	0.0452	0.0409	0.08589	100
		0.3042	1.0194	0.3277	0.7819	0.2473	0.2882	0.0616	0.0581	0.1059	0.0456	0.0445	0.0403	0.08463	200
		0.2274	0.786	0.236	0.6181	0.1807	0.2049	0.0504	0.0495	0.075	0.0444	0.0434	0.0467	0.09807	400
		0.1638	0.5611	0.1644	0.4048	0.1283	0.1321	0.0459	0.045	0.0564	0.0439	0.0495	0.0423	0.08883	800
		0.1278	0.3489	0.1223	0.3153	0.1007	0.1004	0.0428	0.0428	0.0492	0.0467	0.0422	0.0464	0.09744	1600
		0.0892	0.1865	0.1024	0.1862	0.1021	0.0759	0.0415	0.0426	0.0456	0.0447	0.041	0.0406	0.08526	3200
		0.0674	0.129	0.0687	0.139	0.0767	0.0596	0.0416	0.0408	0.0425	0.0411	0.0409	0.0398	0.08358	6400
	TT-2	T-A6											12	25.2
	28.7	0.7257											0.0699	0.14679	50
		0.2786											0.0573	0.12033	100
		0.1839											0.0549	0.11529	200
		0.1198											0.0542	0.11382	400
		0.0886											0.059	0.1239	800
		0.0731											0.0526	0.11046	1600
		0.063											0.0539	0.11319	3200
		0.06											0.057	0.1197	6400

## Sheet: Sheet3
IgG	DB-1	DB1	DB2	DB3	DB4	DB5	DB6	D-A1	D-A2	D-A3	D-A4	D-A5	12
	29	2.5924	2.0457	2.6482	3.0526	1.5794	3.0299	2.7547	1.9504	0.3644	3.2778	2.9687	0.0963	0.20223	200
		1.0744	0.8135	1.0924	1.6929	0.5297	1.5178	1.0093	0.6292	0.1573	1.7043	1.3563	0.0602	0.12642	400
		0.6664	0.497	0.6637	1.0863	0.3216	0.9542	0.6068	0.4036	0.12	1.0569	0.8524	0.0702	0.14742	800
		0.392	0.3005	0.3855	0.677	0.199	0.6095	0.3481	0.2574	0.0888	0.6021	0.519	0.047	0.0987	1600
		0.2271	0.183	0.2233	0.4	0.1253	0.3415	0.2248	0.1807	0.0666	0.3587	0.3622	0.0486	0.10206	3200
		0.1507	0.1306	0.1384	0.2445	0.0885	0.2113	0.1432	0.1391	0.0603	0.2349	0.2403	0.0502	0.10542	6400
		0.0996	0.088	0.0927	0.1555	0.0683	0.1409	0.1023	0.1126	0.0591	0.1559	0.1558	0.0514	0.10794	12800
		0.0821	0.0802	0.0744	0.1099	0.066	0.0986	0.1002	0.1059	0.0518	0.1167	0.1116	0.0497	0.10437	25600
															51200
	DB-2	D-A6											12	25.2
	29	3.4028											0.1152	0.24192	200
		2.7379											0.072	0.1512	400
		1.9532											0.078	0.1638	800
		1.2566											0.0716	0.15036	1600
		0.7546											0.0722	0.15162	3200
		0.4636											0.0706	0.14826	6400
		0.2771											0.0753	0.15813	12800
		0.1924											0.0753	0.15813	25600
															51200
															51200
	EF-1	EF1	EF2	EF3	EF4	EF5	EF6	E-A1	E-A2	E-A3	E-A4	E-A5	12	25.2
	29	3.3272	3.3464	3.1599	3.3364	3.24	3.3632	3.1401	2.1425	1.9733	2.9393	2.0014	0.0809	0.16989	200
		3.0656	3.1001	2.1619	3.2923	2.2863	3.2115	1.7061	0.6837	0.7498	1.3896	0.6821	0.0548	0.11508	400
		2.7188	2.7238	1.5354	3.1698	1.5816	2.9117	1.0902	0.3893	0.4479	0.7897	0.395	0.0585	0.12285	800
		2.1738	2.1694	1.0152	3.0362	1.0042	2.4609	0.6404	0.2315	0.2748	0.462	0.213	0.0493	0.10353	1600
		1.5978	1.6355	0.6412	2.6095	0.625	1.8367	0.376	0.1424	0.1736	0.2707	0.1425	0.0509	0.10689	3200
		1.0742	1.1075	0.4078	2.0951	0.3526	1.323	0.2243	0.0985	0.1162	0.1701	0.0946	0.0538	0.11298	6400
		0.7058	0.7327	0.2452	1.5788	0.2215	0.8785	0.1394	0.0748	0.086	0.111	0.0728	0.0551	0.11571	12800
		0.4551	0.4749	0.1714	1.1628	0.1539	0.6106	0.1076	0.0709	0.0914	0.0901	0.0749	0.0551	0.11571	25600
															51200
	EF-2	E-A6											12	25.2
	29	2.0734											0.0755	0.15855	200
		0.8325											0.0517	0.10857	400
		0.5139											0.051	0.1071	800
		0.3036											0.0542	0.11382	1600
		0.1873											0.0536	0.11256	3200
		0.1235											0.0545	0.11445	6400
		0.0874											0.0511	0.10731	12800
		0.0747											0.0594	0.12474	25600
															51200
	RX-1	RX1	RX2	RX3	RX4	RX5	RX6	R-A1	R-A2	R-A3	R-A4	R-A5	12	25.2
	29	3.0731	1.7249	2.3772	1.2206	0.8504	0.1584	0.8341	3.0499	3.0739	3.0202	3.0094	0.0849	0.17829	200
		2.7368	0.5985	1.0905	0.3786	0.1977	0.0685	0.2521	2.2079	2.2578	2.4702	2.1612	0.0581	0.12201	400
		2.3377	0.358	0.6396	0.2206	0.1149	0.0541	0.2001	1.6258	1.8141	1.874	1.6156	0.0542	0.11382	800
		1.9452	0.2179	0.3804	0.1333	0.0847	0.0518	0.1023	1.0243	1.2081	1.3333	1.011	0.0497	0.10437	1600
		1.4496	0.1434	0.241	0.0897	0.0627	0.0463	0.0766	0.6557	0.7741	0.8832	0.596	0.0532	0.11172	3200
		0.9907	0.0965	0.1432	0.0657	0.0507	0.045	0.0592	0.4237	0.4743	0.5343	0.3579	0.0537	0.11277	6400
		0.6158	0.0724	0.0962	0.0563	0.035	0.0432	0.0553	0.2634	0.3235	0.356	0.2246	0.0555	0.11655	12800
		0.3919	0.0597	0.0707	0.0566	0.0442	0.0464	0.0468	0.1726	0.2077	0.2188	0.1461	0.0567	0.11907	25600
															51200
	RX-2	R-A5											12	25.2
	28.9	3.1806											0.0794	0.16674	200
		2.7724											0.0558	0.11718	400
		2.3226											0.0617	0.12957	800
		1.8153											0.0561	0.11781	1600
		1.2802											0.0574	0.12054	3200
		0.8417											0.0465	0.09765	6400
		0.5454											0.049	0.1029	12800
		0.3544											0.0503	0.10563	25600
															51200
	TT-1	TT1	TT2	TT3	TT4	TT5	TT6	T-A1	T-A2	T-A3	T-A4	T-A5	12	25.2
	29	2.8865	3.0522	2.7811	3.0531	2.9466	2.8255	0.3453	0.3223	0.5225	0.1087	0.0775	0.0682	0.14322	200
		2.1526	2.3348	1.9586	2.4287	2.2102	1.8121	0.1078	0.1069	0.1528	0.0581	0.0554	0.055	0.1155	400
		1.6577	1.7701	1.4123	1.8821	1.7607	1.322	0.0759	0.0749	0.0929	0.0498	0.0567	0.0547	0.11487	800
		1.1795	1.2385	0.9723	1.3873	1.2754	0.8823	0.0574	0.0614	0.0681	0.048	0.0472	0.0541	0.11361	1600
		0.8006	0.8211	0.6336	0.9349	0.8699	0.5369	0.0523	0.0518	0.0598	0.0459	0.0491	0.0512	0.10752	3200
		0.4975	0.5039	0.3814	0.5835	0.5569	0.3334	0.0496	0.0469	0.0506	0.0492	0.0483	0.0526	0.11046	6400
		0.3021	0.3265	0.2504	0.3827	0.3738	0.2208	0.0474	0.0466	0.0531	0.0472	0.049	0.0531	0.11151	12800
		0.2003	0.2069	0.1738	0.2607	0.2568	0.1483	0.0551	0.0576	0.0507	0.0511	0.0524	0.0555	0.11655	25600
															51200
	TT-2	T-A6											12	25.2
	29	0.648											0.0781	0.16401	200
		0.2025											0.053	0.1113	400
		0.1268											0.0513	0.10773	800
		0.0897											0.05	0.105	1600
		0.0677											0.0495	0.10395	3200
		0.0593											0.0487	0.10227	6400
		0.0566											0.052	0.1092	12800
		0.052											0.0517	0.10857	25600
															51200
